# Supplementary material for: New MRI findings of late delayed radiation injuries in long-term survivors after radiotherapy: punctate enhanced dot, oval, or rod-like lesions
Source: Research Square preprint supplement (doi:10.21203/rs.3.rs-7283719/v1), 2025-08-21
Supplement: Supplementary file 1 [file 0a285a9649a59edcab5d688e.docx]

| **Supplemental Table 3. MRI acquisition parameters using the MAGNETOM Vida 3.0T device** | | | | | |  | |  |
| --- | --- | --- | --- | --- | --- | --- | --- | --- |
|  | T1WI | T2WI | 3D FLAIR | T2*WI | 3D MR hydrography  (CISS) | | 3D T1WI  (MPRAGE) | |
| Acuisition plane | 2D axial | 2D axial | 3D sagittal | 2D Axial | 3D Axial | | 3D sagittal | |
| TR (ms) | 500 | 4000 | 10000 | 600 | 5.6 | | 1700 | |
| TE (ms) | 13 | 89 | 118 | 20 | 2.46 | | 2.08 | |
| TI (ms) | NA | NA | 2600 | NA | NA | | 900 | |
| ETL | NA | 15 | 180 | NA | NA | | NA | |
| Flip angle (degrees) | 70 | 90 | 90 | 20 | 40 | | 8 | |
| BW (Hz/Pixel) | 200 | 349 | 651 | 230 | 504 | | 230 | |
| FOV (cm) | 24x19.5 | 24x19.5 | 25.6x25.6 | 24x19.5 | 18x18 | | 25.6x25.6 | |
| Matrix size | 320x192 | 512x410 | 256x256 | 320x256 | 320x320 | | 256x256 | |
| ST (mm) | 5 | 5 | 1.4 | 5 | 0.6 | | 1 | |
| Gap | 1 | 1 |  | 1 |  | |  | |
| NEX | 1 | 2 | 1 | 1 | 1 | | 1 | |
| AF | NA | 2 | 6 | 2 | NA | | 2 | |
| AT | 2min. 37sec. | 1min. 40sec. | 4min. 52sec. | 1min. 19sec. | 3min. 17sec. | | 3min. 56sec. | |
| Note. *3D MR hydrography*, Three-dimensional magnetic resonance hydrography; *CISS*, Constructive interference in steady state; *MPRAGE*, Magnetization prepared rapid acquisition with gradient echo; *TR*, Repetition time; *TE*, Echo time; *TI*, Inversion time; *ETL*, Echo train length; *BW*, Band width; *FOV*, Field of view; *ST*, Slice thickness; *NEX*, Number of excitation; *AF*, Acceleration factor; *AT*, Acquisition time; *NA*, Not applicable. | | | | | | | | |
