# Supplementary material for: New MRI findings of late delayed radiation injuries in long-term survivors after radiotherapy: punctate enhanced dot, oval, or rod-like lesions
Source: Research Square preprint supplement (doi:10.21203/rs.3.rs-7283719/v1), 2025-08-21
Supplement: Supplementary file 2 [file 10110f08a214ad602beb4555.docx]

| **Supplemental Table 2. MRI acquisition parameters using the Signa Artist 1.5T device** | | | | |  | |  | |
| --- | --- | --- | --- | --- | --- | --- | --- | --- |
|  | T1WI | T2WI | 3D FLAIR | T2*WI | | 3D MR hydrography  (FIESTA) | | 3D T1WI (SPGR) |
| Acuisition plane | 2D axial | 2D axial | 3D sagittal | 2D Axial | | 3D Axial | | 3D sagittal |
| TR (ms) | 600 | 4000 | 8000 | 850 | | 5.3 | | 2680 |
| TE (ms) | 10 | 100 | 120 | 25 | | 2.2 | | 3.2 |
| TI (ms) | NA | NA | 2160 | NA | | NA | | 875 |
| ETL | NA | 18 | 200 | NA | | NA | |  |
| Flip angle (degrees) | 73 | 90 | 90 | 25 | | 60 | | 12 |
| BW (kHz) | 62.5 | 62.5 | 41.67 | 12.5 | | 111.11 | | 31.25 |
| FOV (cm) | 24x19.2 | 24x19.2 | 25.6x23 | 24x19.2 | | 20x20 | | 25.6x23 |
| Matrix size | 288x256 | 416x320 | 256x256 | 288x224 | | 288x288 | | 256x256 |
| ST (mm) | 5 | 5 | 1.4 | 5 | | 0.6 | | 1 |
| Gap | 1 | 1 |  | 1 | |  | |  |
| NEX | 2 | 2 | 1 | 1 | | 1 | | 1 |
| AF | 2 | 2 | 4 | 2 | | 1.5 | | 2 |
| AT | 2min. 22sec. | 1min. 12sec. | 5min. 30sec. | 1min. 33sec. | | 3min. 00sec. | | 4min. 56sec. |
| Note. *3D MR hydrography*, Three-dimensional magnetic resonance hydrography; *FIESTA*, Fast imaging employing steady-state acquisition; *SPGR*, Spoiled gradient recalled echo; *TR*, Repetition time; *TE*, Echo time; *TI*, Inversion time; *ETL*, Echo train length; *BW*, Band width; *FOV*, Field of view; *ST*, Slice thickness; *NEX*, Number of excitation; *AF*, Acceleration factor; *AT*, Acquisition time; *NA*, Not applicable. | | | | | | | | |
