# Supplementary material for: New MRI findings of late delayed radiation injuries in long-term survivors after radiotherapy: punctate enhanced dot, oval, or rod-like lesions
Source: Research Square preprint supplement (doi:10.21203/rs.3.rs-7283719/v1), 2025-08-21
Supplement: Supplementary file 3 [file a5a495a6e0f64059d604f2bf.docx]

| **Supplemental Table 1. MRI acquisition parameters using the Signa Premier 3T device** | | | | |  | |  | |
| --- | --- | --- | --- | --- | --- | --- | --- | --- |
|  | T1WI | T2WI | 3D FLAIR | T2*WI | | 3D MR hydrography  (FIESTA) | | 3D T1WI (SPGR) |
| Acuisition plane | 2D axial | 2D axial | 3D sagittal | 2D Axial | | 3D Axial | | 3D sagittal |
| TR (ms) | 600 | 4000 | 10000 | 610 | | 4.8 | | 2500 |
| TE (ms) | 9 | 90 | 120 | 20 | | 1.9 | | 2 |
| TI (ms) | NA | NA | 2540 | NA | | NA | | 1000 |
| ETL | NA | 19 | 220 | NA | | NA | | NA |
| Flip angle (degrees) | 73 | 90 | 90 | 20 | | 60 | | 8 |
| BW (kHz) | 83.3 | 83.3 | 41.67 | 41.67 | | 111.11 | | 62.5 |
| FOV (cm) | 24x19.2 | 24x19.2 | 24x24 | 24x19.2 | | 18x18 | | 24x24 |
| Matrix size | 320x256 | 512x320 | 256x256 | 384x288 | | 352x352 | | 256x256 |
| ST (mm) | 5 | 5 | 1.2 | 5 | | 0.5 | | 0.9 |
| Gap | 1 | 1 |  | 1 | |  | |  |
| NEX | 2 | 2 | 1 | 1 | | 1 | | 1 |
| AF | 2 | 2 | 6 | 2 | | 2 | | 2 |
| AT | 2min. 22sec. | 1min. 10sec. | 5min. 50sec. | 1min. 23sec. | | 3min. 00sec. | | 4min. 59sec. |
| Note. *3D MR hydrography*, Three-dimensional magnetic resonance hydrography; *FIESTA*, Fast imaging employing steady-state acquisition; *SPGR*, Spoiled gradient recalled echo; *TR*, Repetition time; *TE*, Echo time; *TI*, Inversion time; *ETL,* Echo train length; *BW*, Band width; *FOV*, Field of view; *ST*, Slice thickness; *NEX*, Number of excitation; *AF*, Acceleration factor; *AT*, Acquisition time; *NA*, Not applicable. | | | | | | | | |
