# Supplementary material for: New MRI findings of late delayed radiation injuries in long-term survivors after radiotherapy: punctate enhanced dot, oval, or rod-like lesions
Source: Research Square preprint supplement (doi:10.21203/rs.3.rs-7283719/v1), 2025-08-21
Supplement: Supplementary file 4 [file c87520528973bb6a8195613e.docx]

| **Diagnosis** | | **All cases**  **(N=74)** | **Punctate enhancement (+) group**  **(N=19)** | **Punctate enhancement (-) group**  **(N=55)** |
| --- | --- | --- | --- | --- |
| Gliomas, glioneuronal tumors, and neuronal tumors | Astrocytoma, IDH mutant, grade 3* | 5 | 3 | 2 |
| Astrocytoma, IDH mutant, grade 4* | 3 | 1 | 2 |
| Anaplastic astrocytoma, grade Ⅲ** | 4 | 2 | 2 |
| Oligodendroglioma, IDH mutant, 1p/19q-codeleted, grade 3* | 5 | 3 | 2 |
| Oligodendroglioma, grade Ⅱ** | 1 | 0 | 1 |
| Anaplastic oligodendroglioma, grade Ⅲ** | 8 | 3 | 5 |
| Anaplastic oligo-astrocytoma, grade Ⅲ** | 1 | 0 | 1 |
| Glioblastoma, IDH wildtype, grade 4* | 12 | 2 | 10 |
| Glioblastoma, grade Ⅳ** | 4 | 1 | 3 |
| Pleomorphic xanthoastrocytoma, grade 3* | 1 | 0 | 1 |
| Anaplastic ependymoma, grade Ⅲ** | 3 | 2 | 1 |
| Embryonal tumors | Medulloblastoma* | 3 | 1 | 2 |
| Primary central nervous system lymphoma (PCNSL) | Diffuse large B-cell lymphoma (DLBCL) | 15 | 0 | 15 |
| Germ cell tumors | Germinoma | 4 | 0 | 4 |
| Brain metastases | Breast cancer | 1 | 0 | 1 |
| Ovarian cancer | 1 | 0 | 0 |
| Others | Choroid plexus carcinoma, grade 3* | 1 | 0 | 1 |
| Chordoma* | 1 | 0 | 1 |
| Atypical meningioma, grade 2* | 1 | 1 | 0 |

**Supplemental Table 4. Pathological diagnoses of all patients and by group**

* WHO 2021 Classification of Brain Tumors (5th edition).

**WHO 2007 Classification of Brain Tumors (4th edition).
